# Supplementary material for: Interactions between Kazachstania humilis Yeast Species and Lactic Acid Bacteria in Sourdough
Source: MDPI journal article supplement (doi:10.3390/microorganisms8020240), 2020-02-11
Supplement: s1 [file s1]

| Table S1. Bacteria strains assimilation of different substrates as analysed by API 50C (Biomérieux) . |          |          |     |                 |             |                           |              |             |                     |           |              |                           |                        |
|-------------------------------------------------------------------------------------------------------|----------|----------|-----|-----------------|-------------|---------------------------|--------------|-------------|---------------------|-----------|--------------|---------------------------|------------------------|
| Bacteria                                                                                              |          |          |     |                 | D-Galactose | D-Raffinose               | D-Saccharose | D-Glucose   | D-Thréhalose        | D-Maltose | Glycerol     | Méthyl-alpha cycloheximid | acide lactique         |
| Lactobacillus curvatus                                                                                | bB16-cur | MTF 4123 | B16 | facultatively + | -           | +                         | +            | +           | +                   | -         | NA           | NA                        | NA                     |
| Lactobacillus sakei                                                                                   | bB4-sak  | MTF 4118 | B4  | facultatively + | -           | +                         | +            | +           | +                   | -         | NA           | NA                        | NA                     |
| Lactobacillus sanfranciscensis                                                                        | bB4-sf   | MTF 3946 | B4  | obligately he + | -           | -                         | +            | -           | -                   | -         | NA           | NA                        | NA                     |
| Lactobacillus sanfranciscensis                                                                        | bB5-sf   | MTF 3945 | B5  | obligately he - | -           | -                         | +            | -           | +                   | -         | NA           | NA                        | NA                     |
| Lactobacillus hammesii                                                                                | bB5-ham  | MTF 3944 | B5  | obligately he + | -           | -                         | +            | -           | +                   | -         | NA           | NA                        | NA                     |
| Lactobacillus pentosus                                                                                | bB5-pen  | MTF 4114 | B5  | facultatively - | -           | +                         | +            | +           | +                   | -         | NA           | NA                        | NA                     |
| Lactobacillus kimchi                                                                                  | bB5-kim1 | MTF 4117 | B5  | facultatively + | -           | +                         | +            | +           | +                   | -         | NA           | NA                        | NA                     |
| Lactobacillus kimchi                                                                                  | bB5-kim6 | MTF 4116 | B5  | facultatively + | -           | +                         | +            | +           | +                   | -         | NA           | NA                        | NA                     |
| Bacteria                                                                                              |          |          |     |                 | D-Fructose  | D-Mannose                 | D-Mannitol   | D-Arabinose | L-Arabinose         | D-ribose  | D-xylose     | D-Adonitol                | Méthyl-beta L-Rhamnose |
| Lactobacillus curvatus                                                                                | bB16-cur | MTF 4123 | B16 | facultatively + | +           | -                         | -            | -           | +                   | -         | -            | -                         | -                      |
| Lactobacillus sakei                                                                                   | bB4-sak  | MTF 4118 | B4  | facultatively + | +           | -                         | -            | +           | +                   | -         | -            | -                         | +                      |
| Lactobacillus sanfranciscensis                                                                        | bB4-sf   | MTF 3946 | B4  | obligately he + | +           | +                         | +            | +           | +                   | -         | -            | +                         | -                      |
| Lactobacillus sanfranciscensis                                                                        | bB5-sf   | MTF 3945 | B5  | obligately he - | -           | -                         | -            | -           | -                   | -         | -            | -                         | -                      |
| Lactobacillus hammesii                                                                                | bB5-ham  | MTF 3944 | B5  | obligately he + | +           | -                         | -            | +           | +                   | +         | -            | +                         | -                      |
| Lactobacillus pentosus                                                                                | bB5-pen  | MTF 4114 | B5  | facultatively + | +           | +                         | -            | -           | +                   | +         | +            | -                         | -                      |
| Lactobacillus kimchi                                                                                  | bB5-kim1 | MTF 4117 | B5  | facultatively + | +           | -                         | -            | +           | +                   | +         | -            | +                         | -                      |
| Lactobacillus kimchi                                                                                  | bB5-kim6 | MTF 4116 | B5  | facultatively + | +           | -                         | -            | -           | +                   | +         | -            | -                         | -                      |
| Bacteria                                                                                              |          |          |     |                 | D-Sorbitol  | Méthyl-alpha N-AcéthylGlc | Amygdaline   | Arbutine    | Esculine            | Salicine  | D-cellobiose | D-Mélibiose               | D-Mélezitose           |
| Lactobacillus curvatus                                                                                | bB16-cur | MTF 4123 | B16 | facultatively - | -           | +                         | -            | -           | +                   | -         | -            | -                         | -                      |
| Lactobacillus sakei                                                                                   | bB4-sak  | MTF 4118 | B4  | facultatively - | -           | +                         | -            | -           | +                   | +         | +            | +                         | -                      |
| Lactobacillus sanfranciscensis                                                                        | bB4-sf   | MTF 3946 | B4  | obligately he - | -           | +                         | -            | -           | -                   | -         | -            | -                         | -                      |
| Lactobacillus sanfranciscensis                                                                        | bB5-sf   | MTF 3945 | B5  | obligately he - | +           | -                         | -            | -           | -                   | -         | -            | -                         | -                      |
| Lactobacillus hammesii                                                                                | bB5-ham  | MTF 3944 | B5  | obligately he - | -           | +                         | -            | -           | -                   | -         | -            | -                         | -                      |
| Lactobacillus pentosus                                                                                | bB5-pen  | MTF 4114 | B5  | facultatively + | -           | +                         | -            | +           | +                   | +         | +            | -                         | -                      |
| Lactobacillus kimchi                                                                                  | bB5-kim1 | MTF 4117 | B5  | facultatively - | -           | +                         | +            | +           | +                   | +         | +            | -                         | +                      |
| Lactobacillus kimchi                                                                                  | bB5-kim6 | MTF 4116 | B5  | facultatively - | -           | +                         | +            | +           | +                   | +         | +            | -                         | +                      |
| Bacteria                                                                                              |          |          |     |                 | Amidon      | Gentiobiose               | D-Lyxose     | D-Arabitol  | Potassium Gluconate |           |              |                           |                        |
| Lactobacillus curvatus                                                                                | bB16-cur | MTF 4123 | B16 | facultatively - | -           | -                         | -            | -           |                     |           |              |                           |                        |
| Lactobacillus sakei                                                                                   | bB4-sak  | MTF 4118 | B4  | facultatively - | +           | -                         | -            | +           |                     |           |              |                           |                        |
| Lactobacillus sanfranciscensis                                                                        | bB4-sf   | MTF 3946 | B4  | obligately he - | -           | +                         | +            | +           |                     |           |              |                           |                        |
| Lactobacillus sanfranciscensis                                                                        | bB5-sf   | MTF 3945 | B5  | obligately he - | -           | -                         | -            | -           |                     |           |              |                           |                        |
| Lactobacillus hammesii                                                                                | bB5-ham  | MTF 3944 | B5  | obligately he - | -           | +                         | +            | +           |                     |           |              |                           |                        |
| Lactobacillus pentosus                                                                                | bB5-pen  | MTF 4114 | B5  | facultatively + | +           | -                         | -            | +           |                     |           |              |                           |                        |
| Lactobacillus kimchi                                                                                  | bB5-kim1 | MTF 4117 | B5  | facultatively - | +           | -                         | +            | +           |                     |           |              |                           |                        |
| Lactobacillus kimchi                                                                                  | bB5-kim6 | MTF 4116 | B5  | facultatively - | +           | -                         | -            | -           |                     |           |              |                           |                        |

| Table S2. Yeast strains assimilation of different substrates as analysed by API ID32 C (Biomérieux). Only sybrates that are assimilated by at least on strain are shown. |               |          |       |             |                        |             |              |           |             |           |          |                                          |
|--------------------------------------------------------------------------------------------------------------------------------------------------------------------------|---------------|----------|-------|-------------|------------------------|-------------|--------------|-----------|-------------|-----------|----------|------------------------------------------|
| Species                                                                                                                                                                  | Strain's code | Lab code | Baker | Main physio | Assimilated substrates |             |              |           |             |           |          |                                          |
| Yeast                                                                                                                                                                    |               |          |       |             | D-Galactose            | D-Raffinose | D-Saccharose | D-Glucose | D-Trehalose | D-Maltose | Glycerol | Méthyl-alpha cycloheximid acide lactique |
| Saccharomyces cerevisiae                                                                                                                                                 | yB10F-9       | MTF3947  | B10   | maltose-pos | +                      | +           | +            | +         | -           | +         | -        | +                                        |
| Kazachstania humilis                                                                                                                                                     | yB6-15        | MTF3948  | B6    | maltose-neg | +                      | +           | +            | +         | +           | -         | +        | +                                        |
| Kazachstania humilis                                                                                                                                                     | yB5-TP1       | MTF3949  | B5    | maltose-neg | +                      | +           | +            | +         | +           | -         | -        | -                                        |
| Kazachstania humilis                                                                                                                                                     | yB5-AC1       | MTF4070  | B5    | maltose-neg | +                      | +           | +            | +         | +           | -         | -        | -                                        |

Table S3. Analysis of variance of yeast CFUs after 24h.

|              | Df | Sum Sq | Mean Sq | F value | P-value |
|--------------|----|--------|---------|---------|---------|
| Yeast strain | 3  | 17863  | 5954    | 7.38    | 0.003** |
| Residuals    | 14 | 11293  | 807     |         |         |

Table S4. Analysis of variance of Lactic Acid Bacteria CFUs after 24h.

|            | Df | Sum Sq   | Mean Sq | F value | P-value    |
|------------|----|----------|---------|---------|------------|
| LAB strain | 7  | 11770838 | 1681548 | 10.2    | 0.00002*** |
| Residuals  | 20 | 3301333  | 165067  |         |            |

Table S5. Analysis of variance of dough height after 6h. Type corresponds to either bacteria or yeast.

|           | Df | Sum Sq | Mean Sq | F value | P-value       |
|-----------|----|--------|---------|---------|---------------|
| Block     | 1  | 1.8    | 1.8     | 29.74   | 1.77 E-05 *** |
| Type      | 1  | 10.125 | 10.125  | 167.26  | 9.31 E-12 *** |
| Strain    | 5  | 6.185  | 1.237   | 20.43   | 1.33 E-07 *** |
| Residuals | 22 | 1.332  |         |         |               |

Table S6. Analysis of variance of metabolite concentrations in monoculture.

| Variable     | Df | Sum Sq | Mean Sq | F value | P-value       |
|--------------|----|--------|---------|---------|---------------|
| Maltose      |    |        |         |         |               |
| Block        | 1  | 20.50  | 20.50   | 71.10   | 4.84 E-09 *** |
| LAB/Yeast/no | 2  | 0.16   | 0.08    | 0.28    | 0.76          |

|                |    |           |           |        |               |
|----------------|----|-----------|-----------|--------|---------------|
| Strains (Type) | 5  | 22.80     | 4.55      | 15.80  | 2.74 E-07 *** |
| Residuals      | 27 | 7.79      | 0.29      | NA     | NA            |
| Glucose        |    |           |           |        |               |
| Block          | 1  | 4.70      | 4.70      | 74.30  | 3.10 E-09 *** |
| LAB/Yeast/no   | 2  | 3.48      | 1.74      | 27.50  | 3.07 E-07 *** |
| Strains (Type) | 5  | 3.12      | 0.62      | 9.85   | 1.91 E-05 *** |
| Residuals      | 27 | 1.71      | 0.06      | NA     | NA            |
| Fructose       |    |           |           |        |               |
| Block          | 1  | 0.05      | 0.05      | 4.85   | 0.04 *        |
| LAB/Yeast/no   | 2  | 0.61      | 0.30      | 28.70  | 2.09 E-07 *** |
| Strains (Type) | 5  | 0.17      | 0.03      | 3.11   | 0.02 *        |
| Residuals      | 27 | 0.29      | 0.01      | NA     | NA            |
| Glycerol       |    |           |           |        |               |
| Block          | 1  | 0.02      | 0.02      | 28.90  | 1.26 E-05 *** |
| LAB/Yeast/no   | 2  | 0.16      | 0.08      | 117.00 | 1.05 E-13 *** |
| Strains (Type) | 5  | 0.09      | 0.02      | 25.10  | 3.43 E-09 *** |
| Residuals      | 26 | 0.02      | 0.00      | NA     | NA            |
| Ethanol        |    |           |           |        |               |
| Block          | 1  | 0.44      | 0.44      | 18.20  | 2.32 E-04 *** |
| LAB/Yeast/no   | 2  | 11.70     | 5.85      | 244.00 | 1.41 E-17 *** |
| Strains (Type) | 5  | 5.77      | 1.15      | 48.20  | 2.49 E-12 *** |
| Residuals      | 26 | 0.62      | 0.02      | NA     | NA            |
| Pyruvate       |    |           |           |        |               |
| Block          | 1  | 3.83 E-06 | 3.83 E-06 | 14.8   | 6.93 E-04 *** |
| LAB/Yeast/no   | 2  | 1.07 E-06 | 5.37 E-07 | 2.08   | 0.15          |
| Strains (Type) | 5  | 1.40 E-06 | 2.81 E-07 | 1.09   | 0.39          |
| Residuals      | 26 | 6.72 E-06 | 2.58 E-07 | NA     | NA            |
| Acetate        |    |           |           |        |               |
| Block          | 1  | 0.04      | 0.04      | 226    | 2.48 E-14 **  |
| LAB/Yeast/no   | 2  | 0.11      | 0.05      | 301    | 1.05 E-18 *** |
| Strains (Type) | 5  | 4.75E-03  | 9.49E-04  | 5.29   | 1.76 E-03 **  |
| Residuals      | 26 | 4.67E-03  | 1.80E-04  | NA     | NA            |
| Lactate        |    |           |           |        |               |
| Block          | 1  | 1.48      | 1.48      | 277    | 2.18 E-15 *** |
| LAB/Yeast/no   | 2  | 4.38      | 2.19      | 411    | 2.14 E-20 *** |
| Strains (Type) | 5  | 0.08      | 0.02      | 3.14   | 0.02          |
| Residuals      | 26 | 0.14      | 0.01      | NA     | NA            |
|                |    |           |           |        |               |

Table S7. Analysis of variance of the interaction effect (CFUs) for each yeast strains. The interaction effect was tested by comparing the yeast's CFUs after 24h in monoculture and co-cultures with LAB strain.

| Yeast strain    | Df  | Sum Sq | Mean Sq | F value | P-value    |
|-----------------|-----|--------|---------|---------|------------|
|                 |     |        |         |         |            |
| yB5-TP1         |     |        |         |         |            |
| Mono/Cocultures | 4   | 142905 | 35726   | 112     | 8 E-31 *** |
| Residuals       | 75  | 23947  | 319     |         |            |
| yB6-15          |     |        |         |         |            |
| Mono/Cocultures | 6   | 106532 | 17755   | 32      | 6 E-23 *** |
| Residuals       | 121 | 66659  | 551     |         |            |
| yB10F-9         |     |        |         |         |            |
| Mono/Cocultures | 3   | 125696 | 41898   | 54      | 8 E-15 *** |
| Residuals       | 44  | 33993  | 773     |         |            |
| yB5-AC1         |     |        |         |         |            |
| Mono/Cocultures | 3   | 36525  | 12175   | 30      | 7 E-12***  |
| Residuals       | 60  | 24712  | 412     |         |            |

Table S8. Analysis of variance comparing the LAB/yeast competition effect between yeast strains. The competition effect was measured as the ratio between the CFUs in co-culture over the CFUs in monoculture

|               | Df | Sum Sq | Mean Sq | F value | P-value |
|---------------|----|--------|---------|---------|---------|
| Yeast strains | 3  | 0.048  | 0.017   | 0.28    | 0.83    |
| Residuals     | 16 | 0.88   | 0.055   |         |         |

Table S9. Analysis of variance of the interaction effect (CFUs) for each LAB strain. The interaction effect was tested by comparing the LAB's CFUs after 24h in monoculture and co-cultures with yeast strain.

|                 | df | sumsq    | meansq  | statistic | p.value       |
|-----------------|----|----------|---------|-----------|---------------|
| <b>bB16-cur</b> |    |          |         |           |               |
| yeast           | 1  | 21376    | 21376   | 0.2       | 0.65          |
| Residuals       | 26 | 2663671  | 102449  |           |               |
| <b>bB5-sf</b>   |    |          |         |           |               |
| yeast           | 4  | 1932259  | 483065  | 2         | 0.16          |
| Residuals       | 81 | 23457037 | 289593  |           |               |
| <b>bB5-pen</b>  |    |          |         |           |               |
| yeast           | 2  | 172933   | 86466   | 2         | 0.12          |
| Residuals       | 41 | 1621739  | 39555   |           |               |
| <b>bB5-ham</b>  |    |          |         |           |               |
| yeast           | 3  | 2945287  | 981762  | 5         | 2.65 E-03 **  |
| Residuals       | 76 | 14440092 | 190001  |           |               |
| <b>bB5-kim1</b> |    |          |         |           |               |
| yeast           | 1  | 672145   | 672145  | 15        | 6.66 E-04 *** |
| Residuals       | 26 | 1170650  | 45025   |           |               |
| <b>bB5-kim6</b> |    |          |         |           |               |
| yeast           | 1  | 1247616  | 1247616 | 20        | 2.06 E-04 *** |
| Residuals       | 22 | 1392744  | 63307   |           |               |
| <b>bB4-sf</b>   |    |          |         |           |               |
| yeast           | 3  | 1380913  | 460304  | 3         | 0.0392 *      |
| Residuals       | 56 | 8660857  | 154658  |           |               |
| <b>bB4-sak</b>  |    |          |         |           |               |
| yeast           | 1  | 74817    | 74817   | 1         | 0.26          |
| Residuals       | 22 | 1247423  | 56701   |           |               |
