# Supplementary material for: Interactions between Kazachstania humilis Yeast Species and Lactic Acid Bacteria in Sourdough
Source: MDPI journal article supplement (doi:10.3390/microorganisms8020240), 2020-02-11

Ph effect on population size

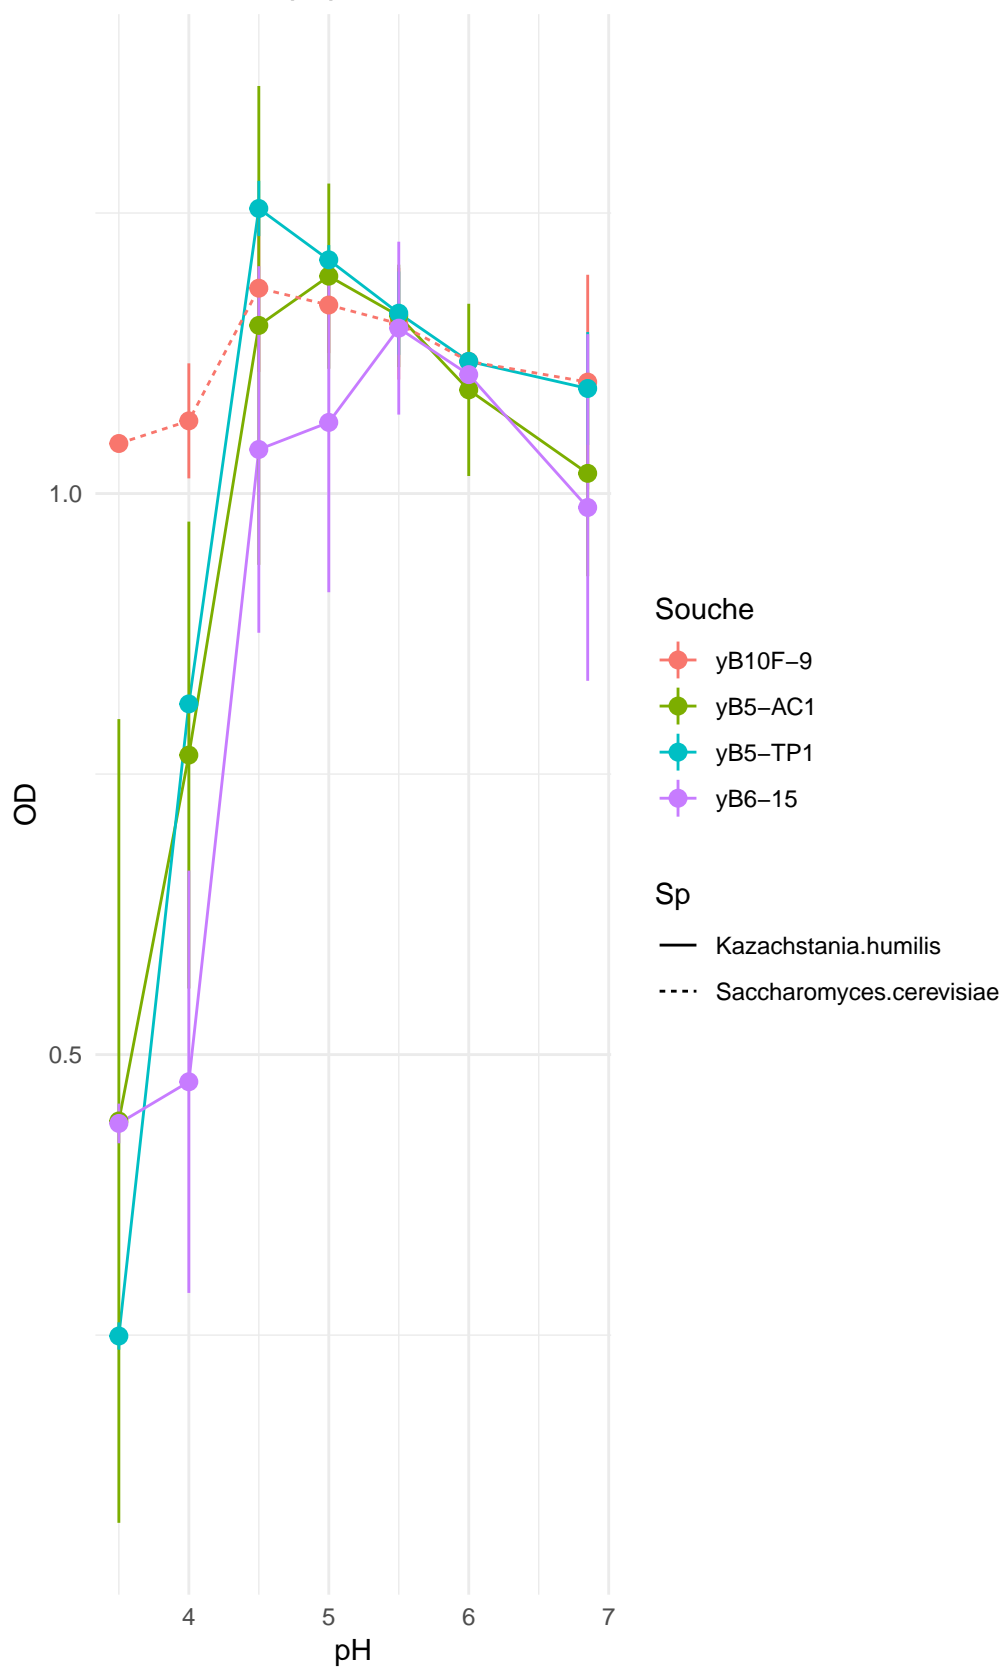

Lactate effect on population size

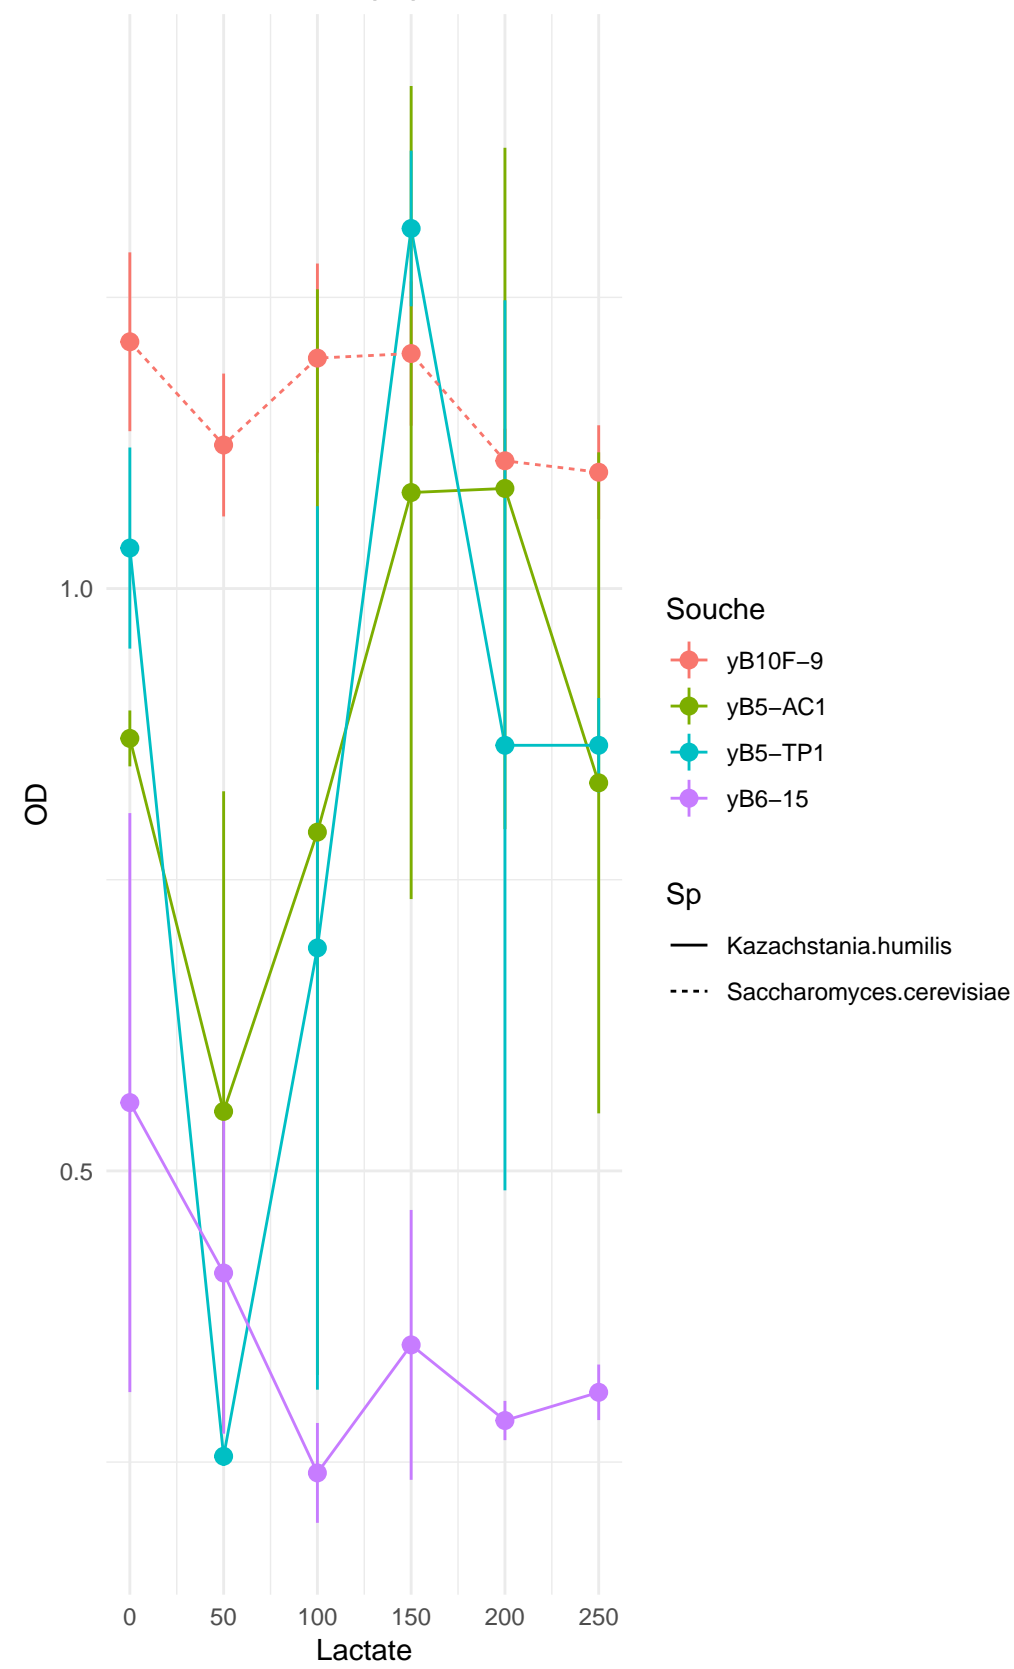

Acetate effect on population size

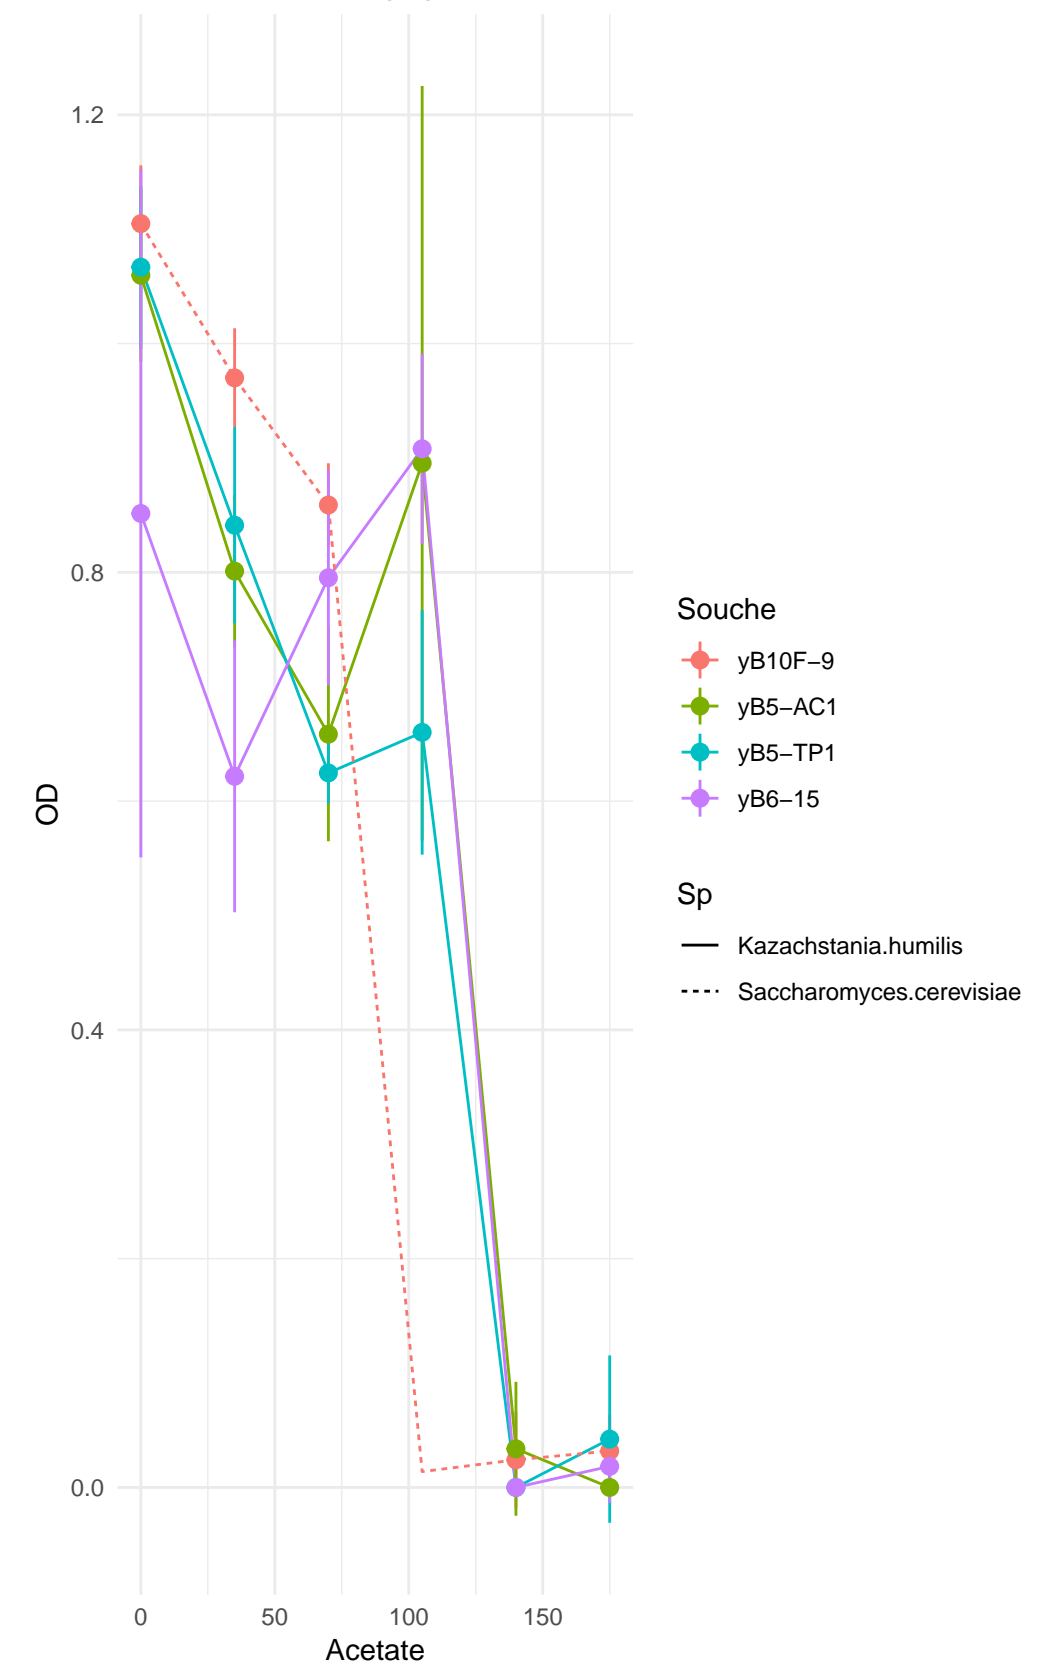

Supplement: s1 [file s1]
