# Supplementary figures and images for: Interactions between Kazachstania humilis Yeast Species and Lactic Acid Bacteria in Sourdough
Source: MDPI journal article supplement (doi:10.3390/microorganisms8020240), 2020-02-11

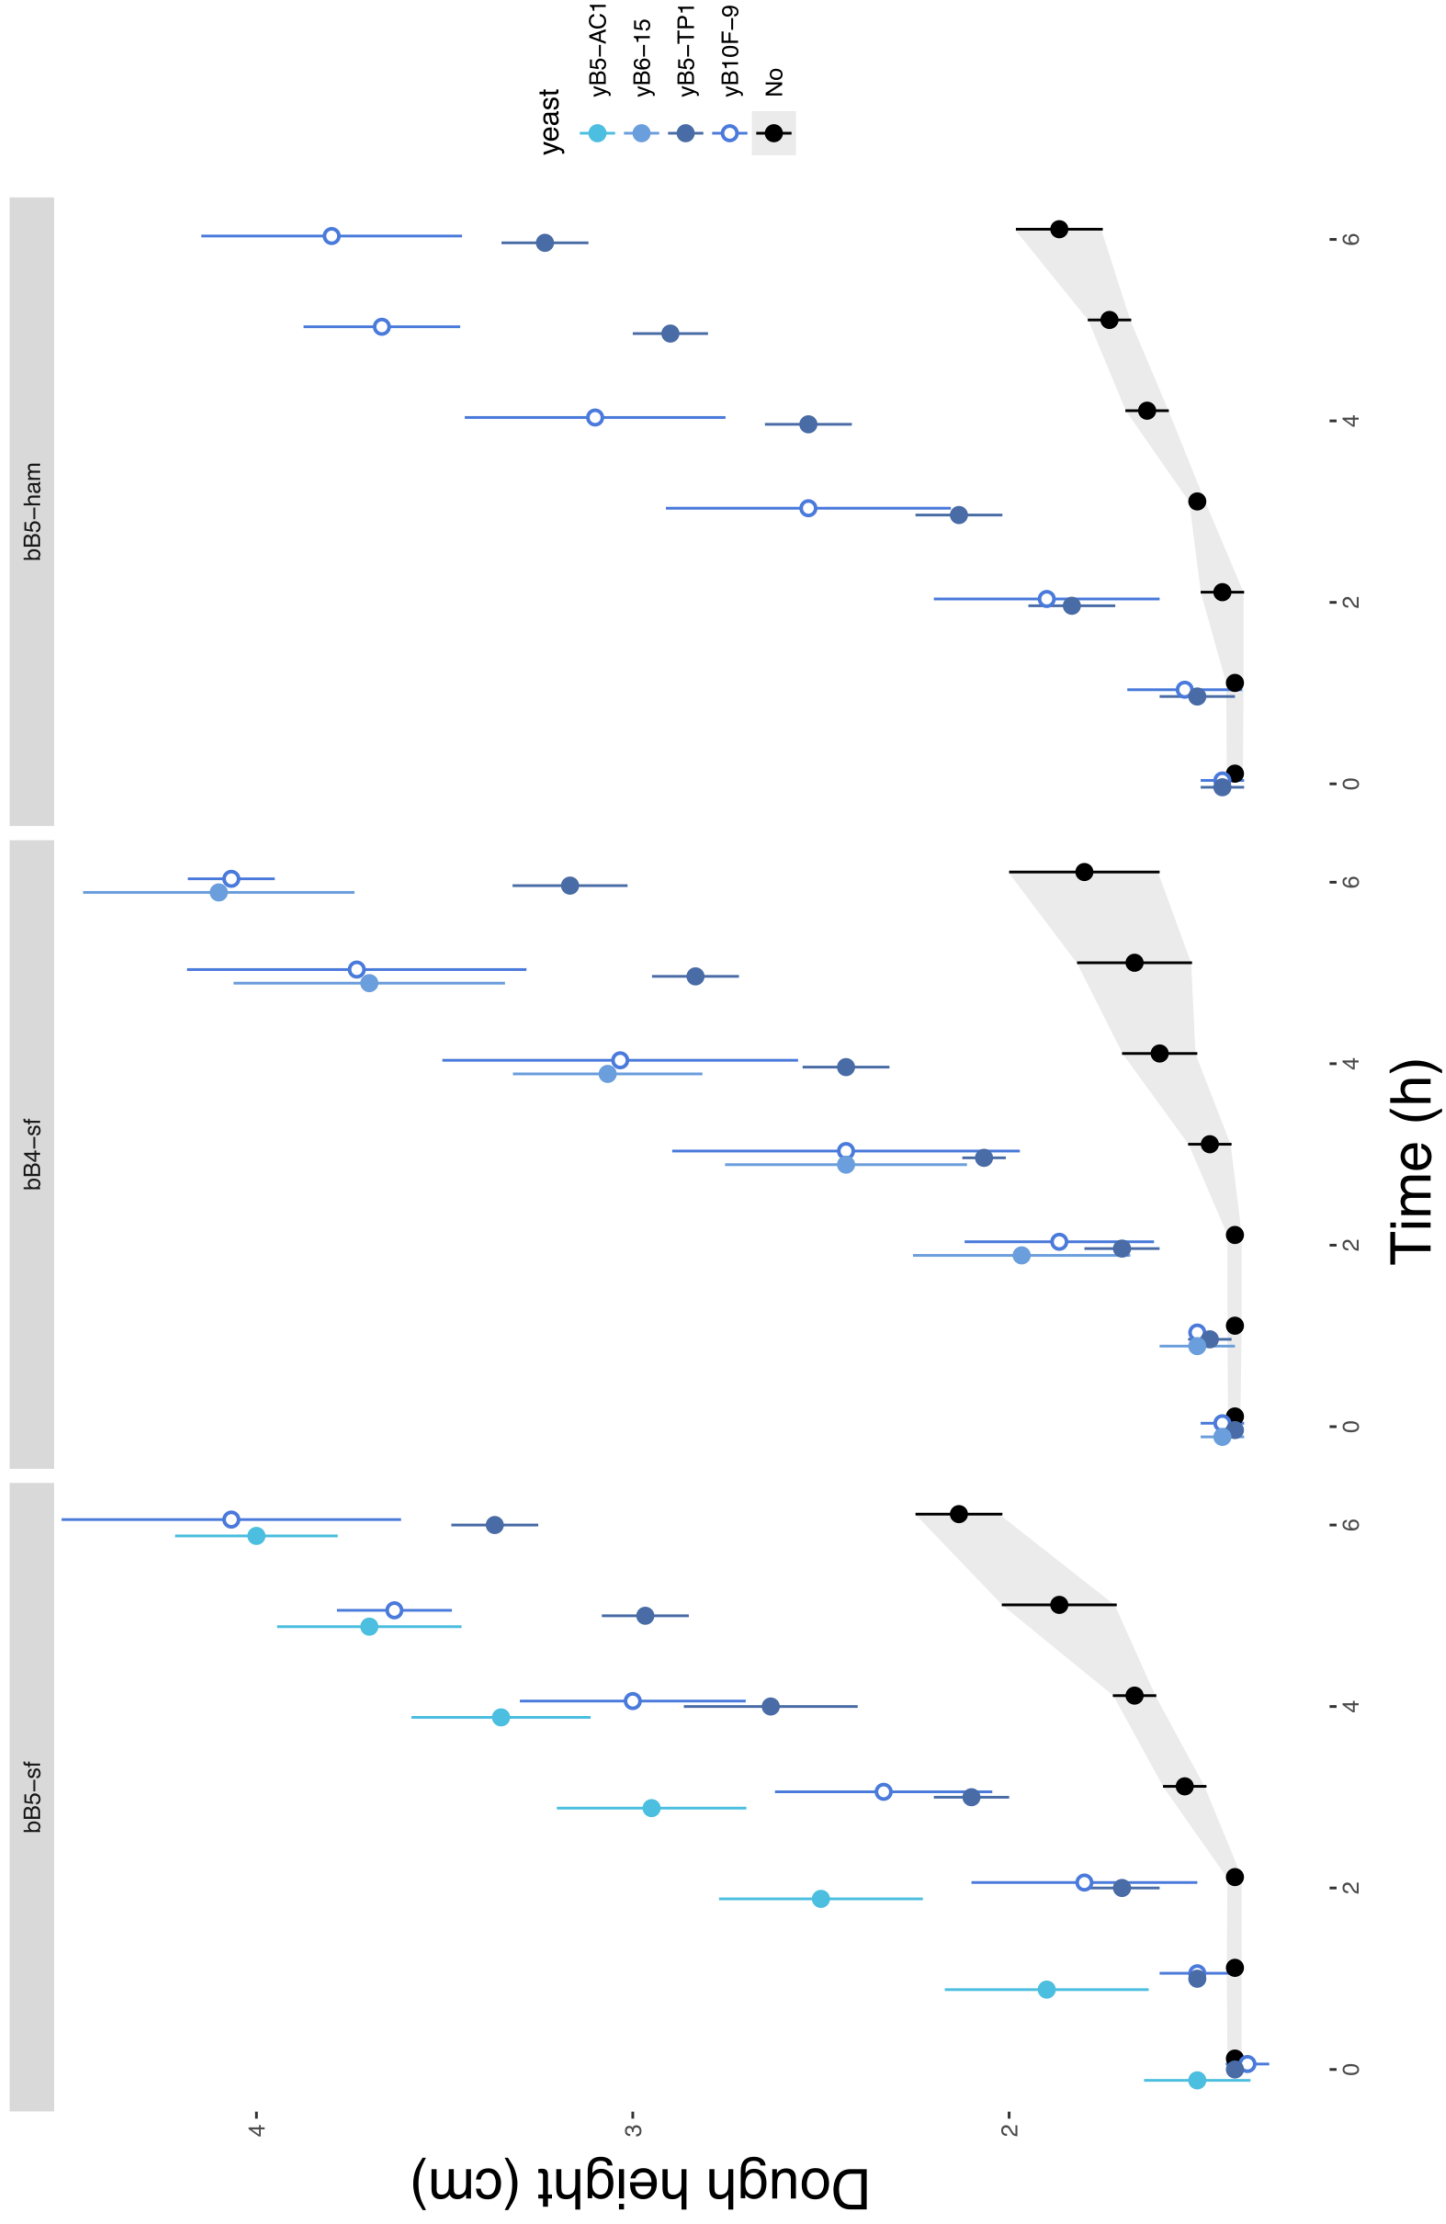

Supplement: s1 [file s1]

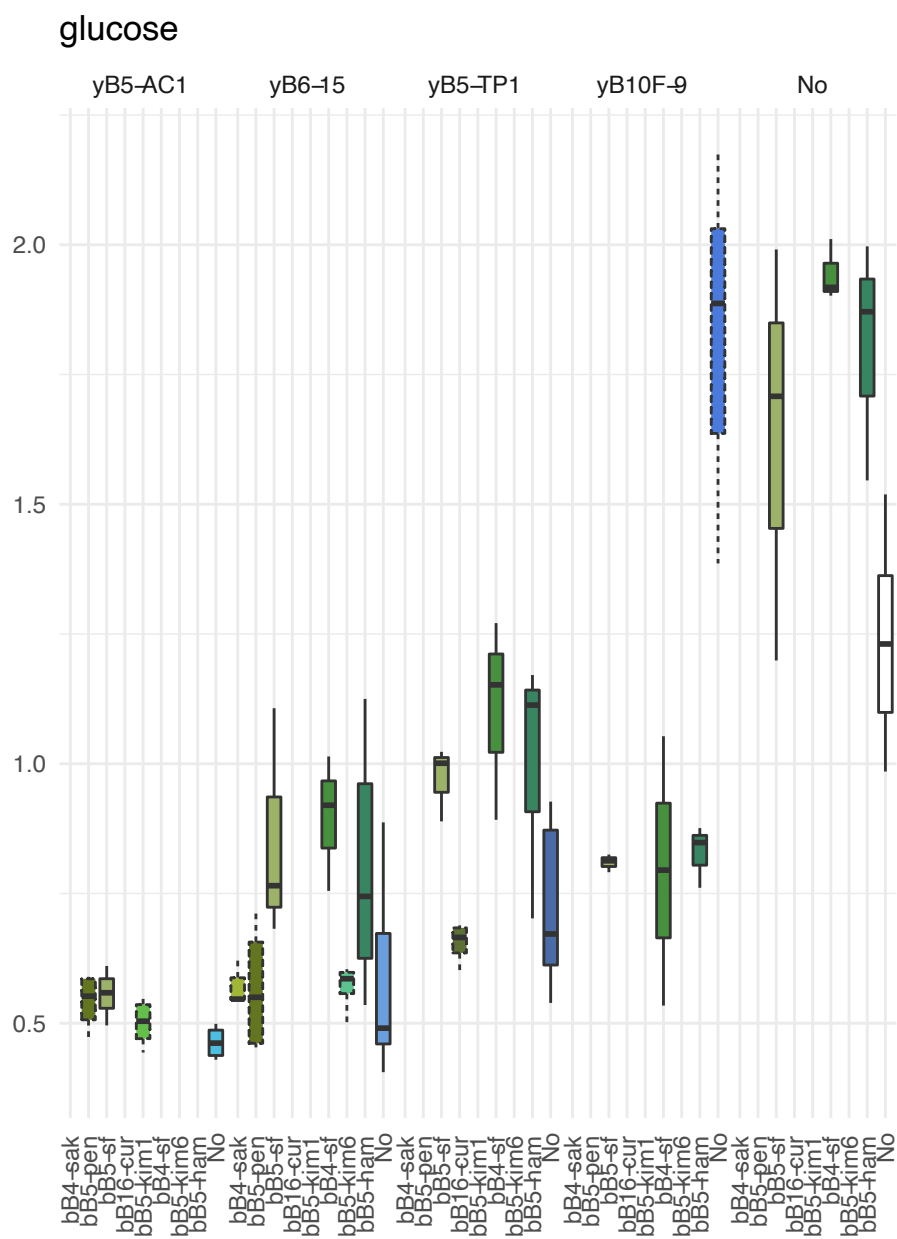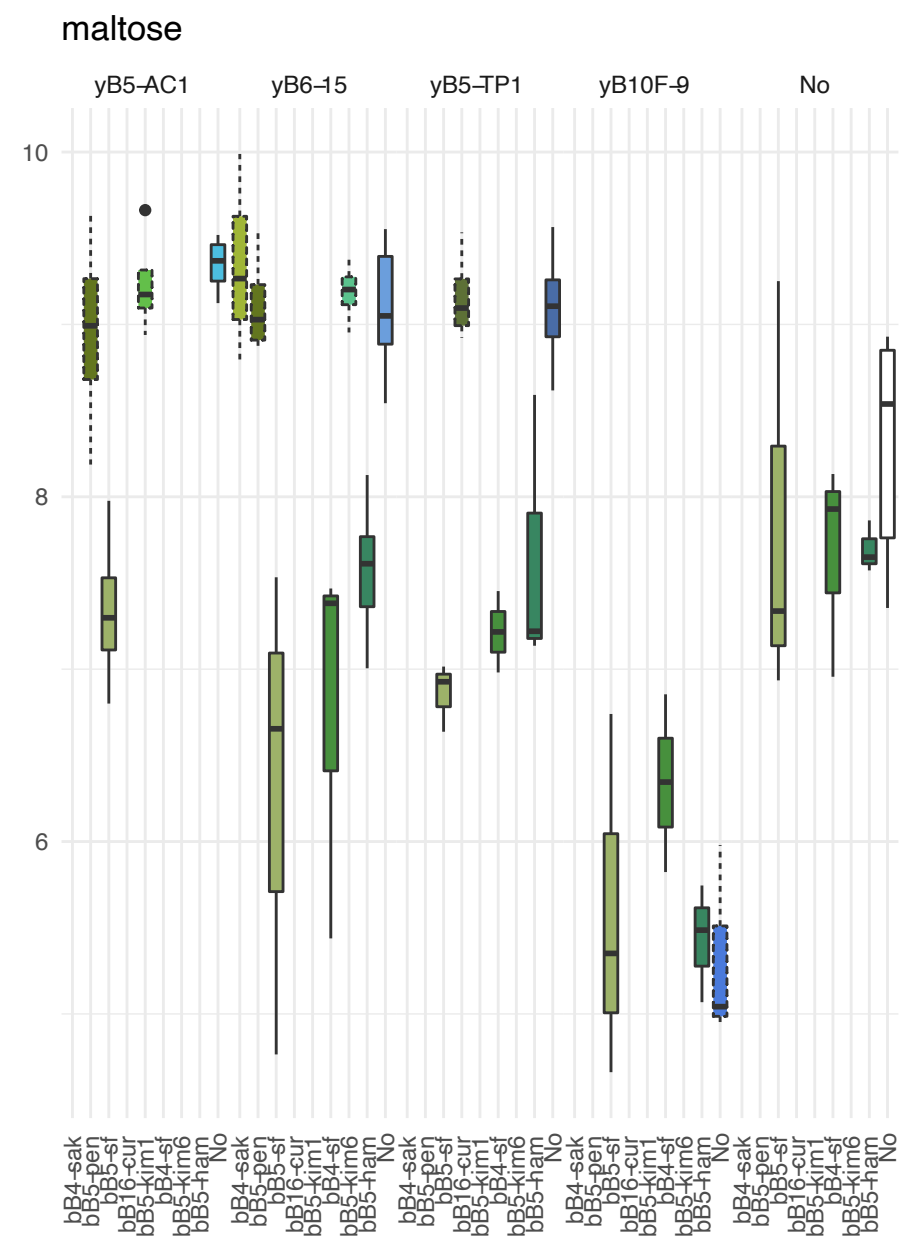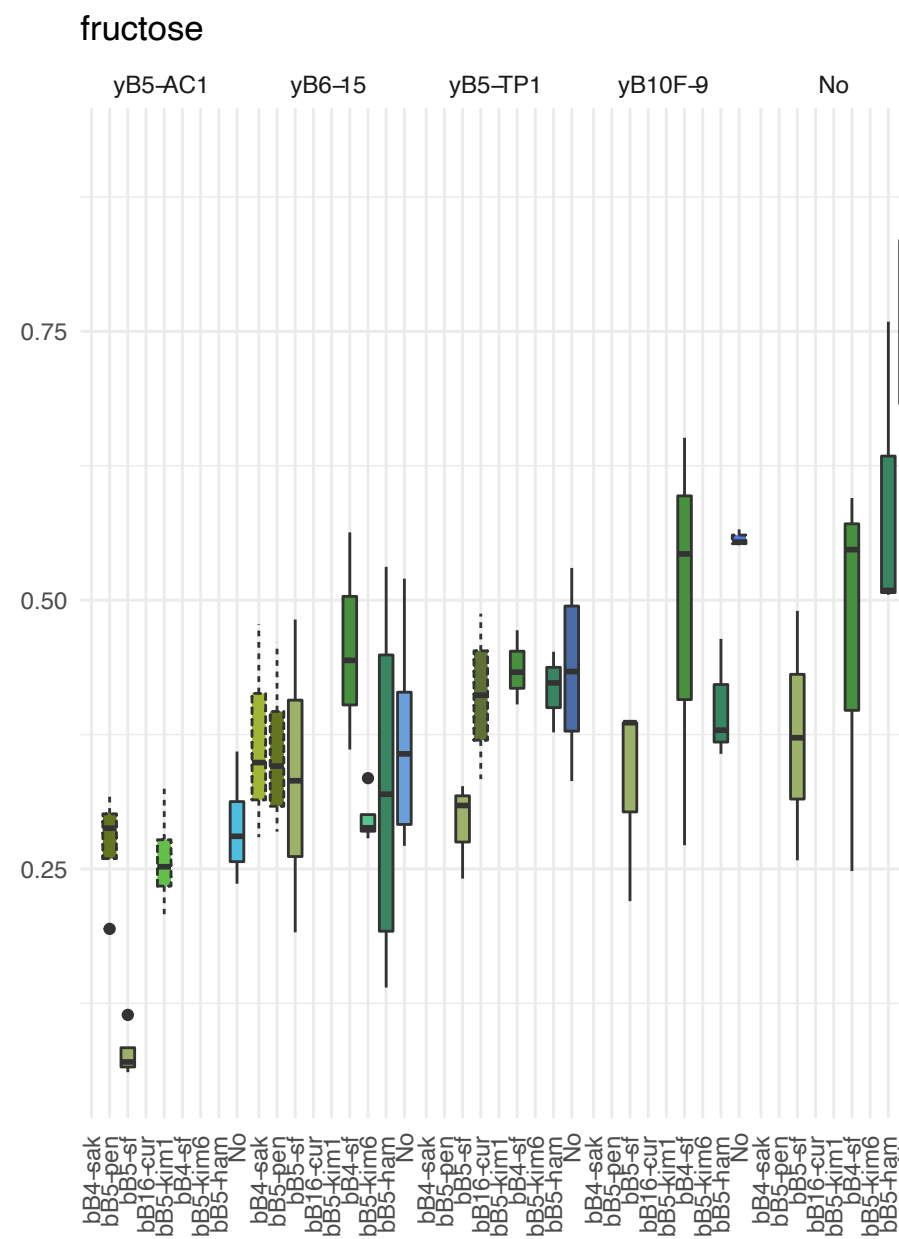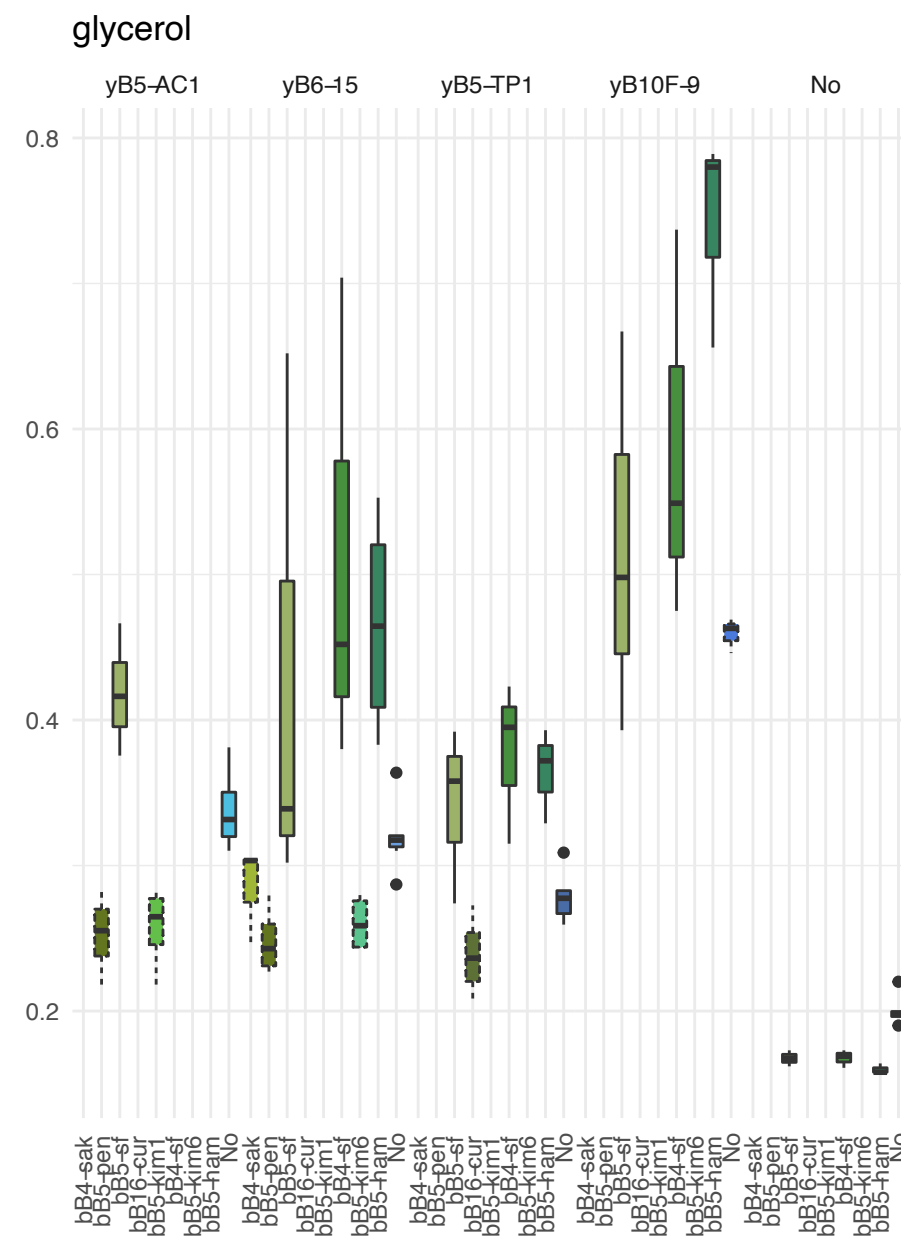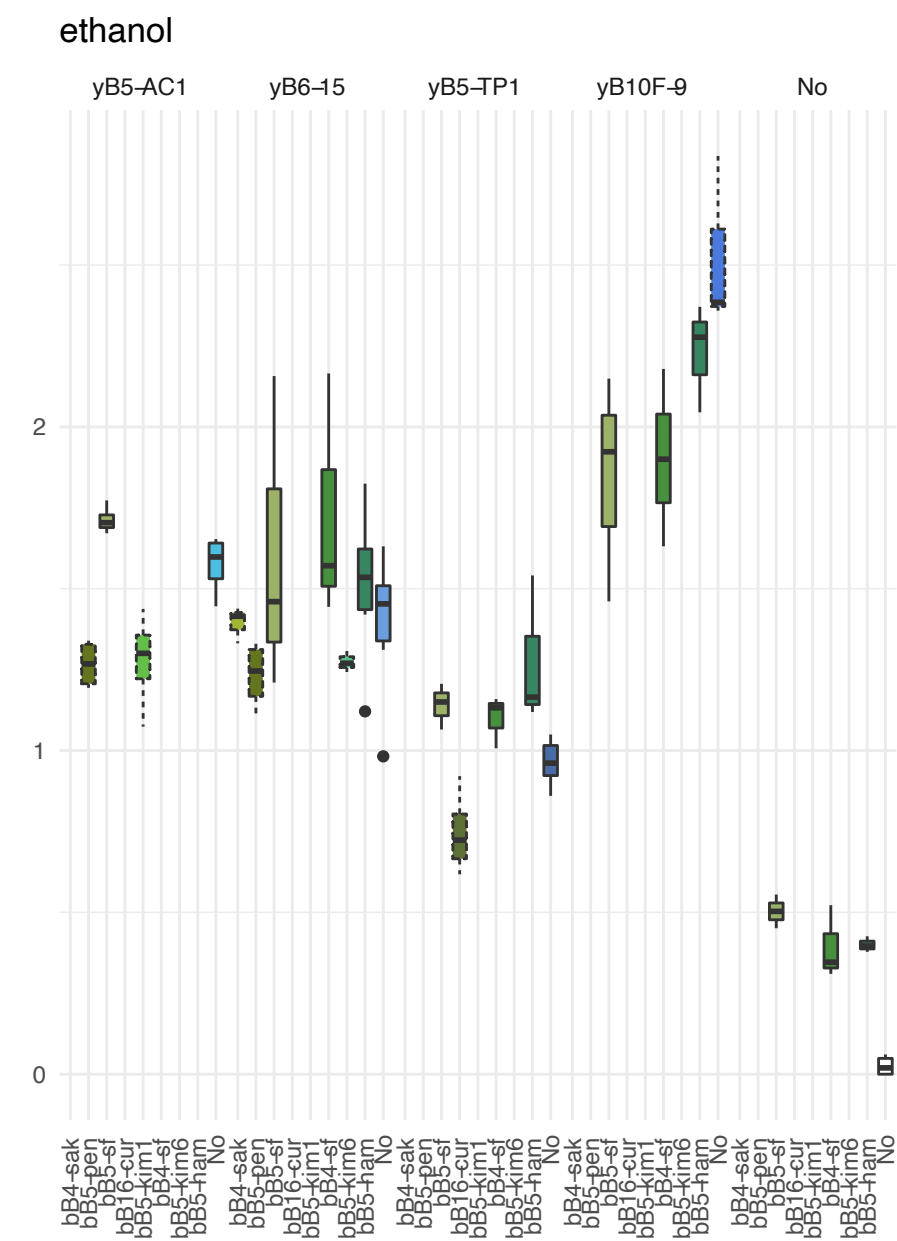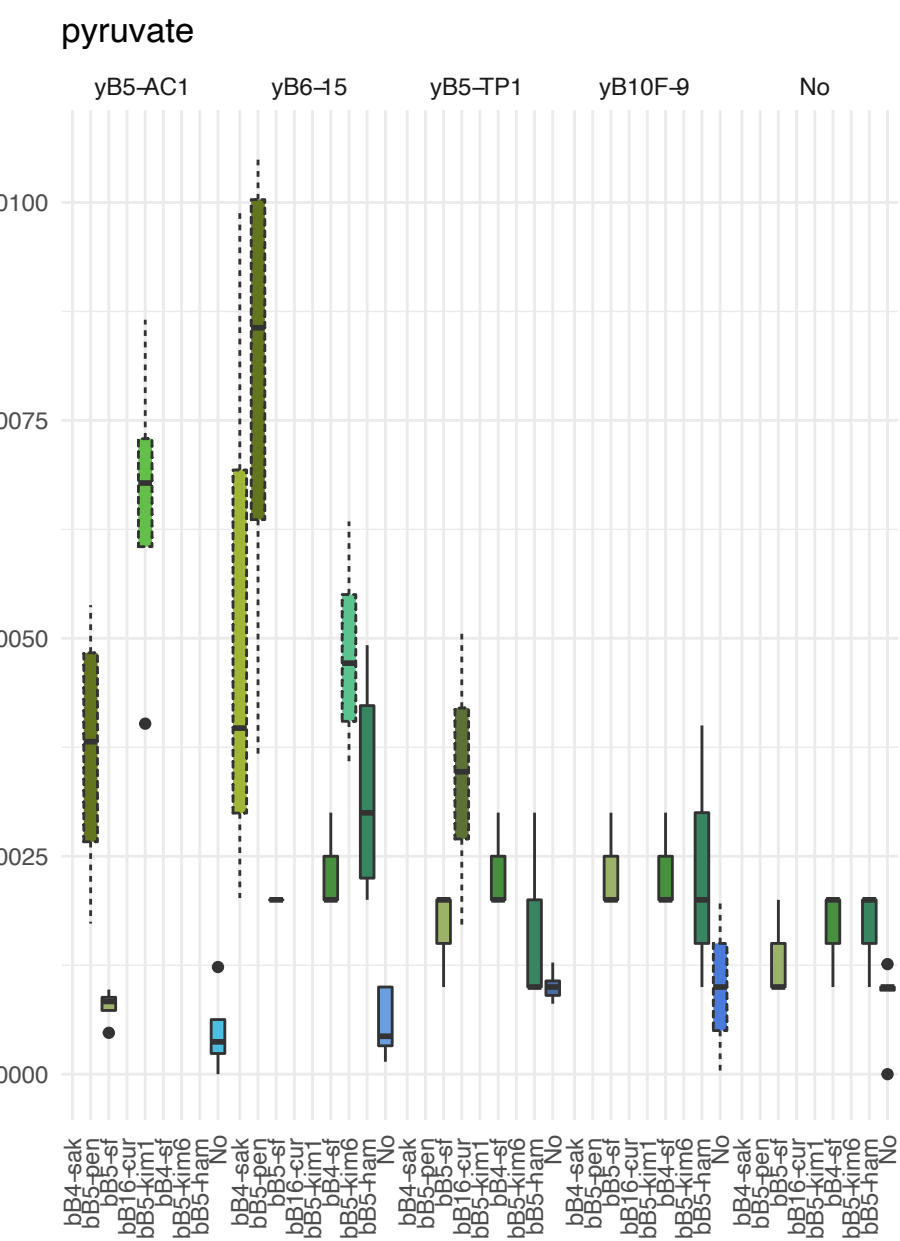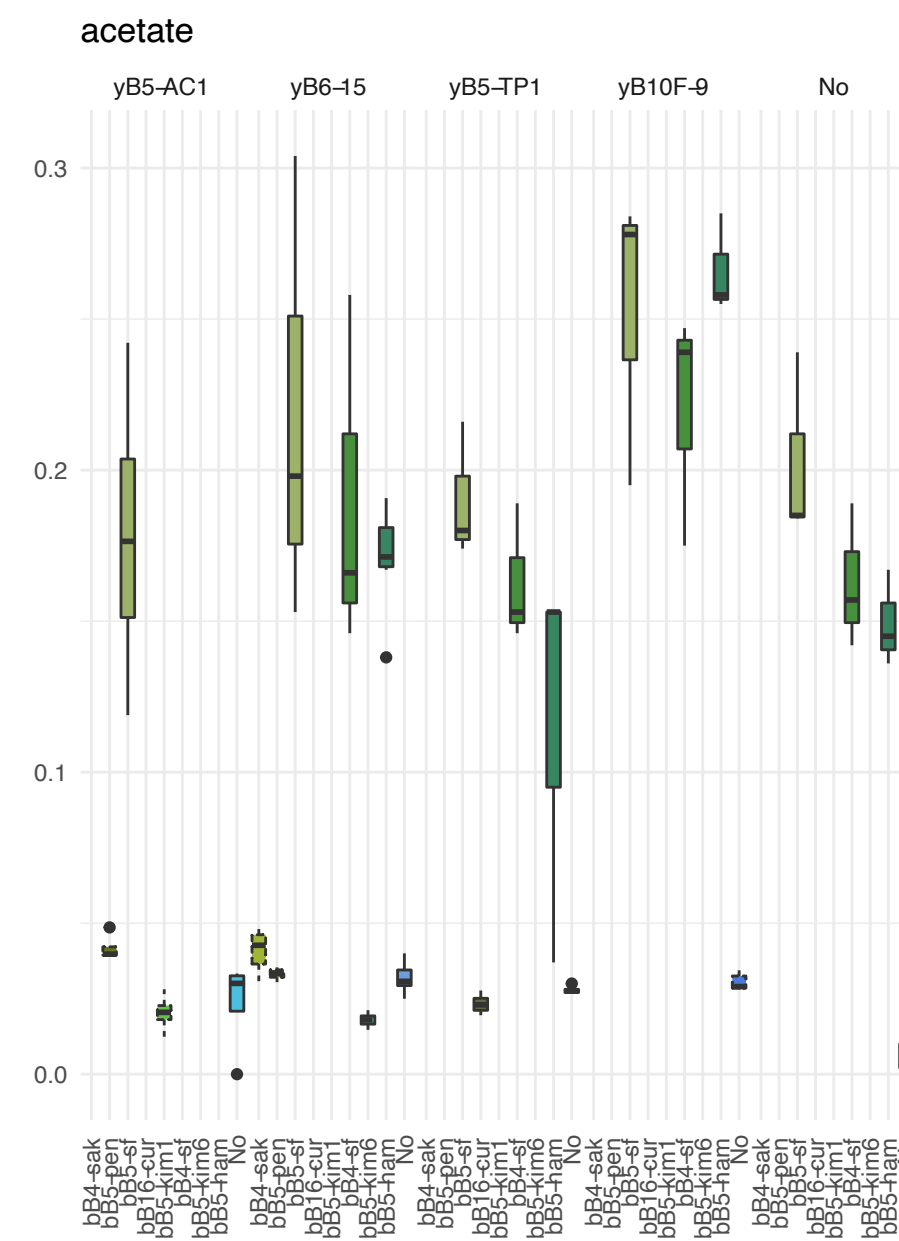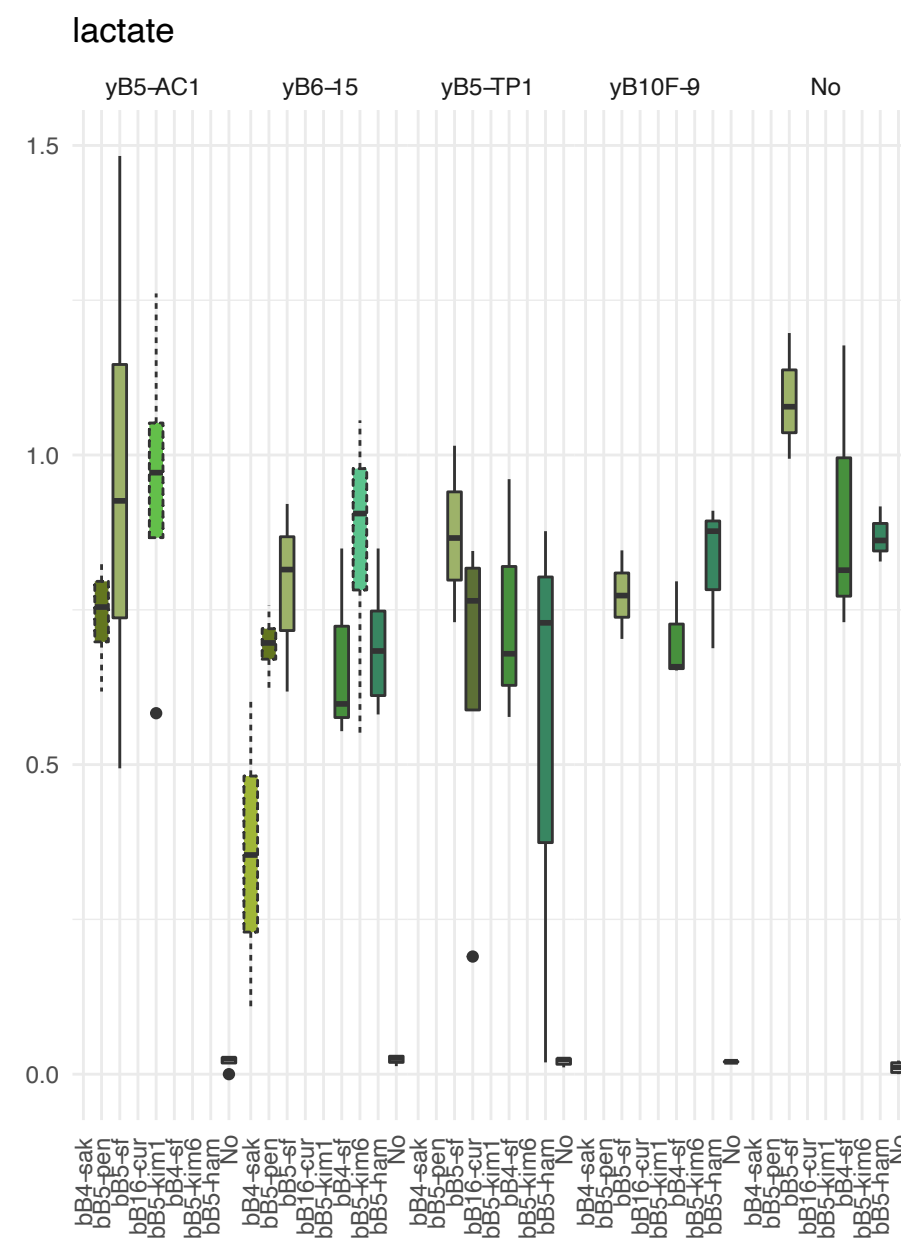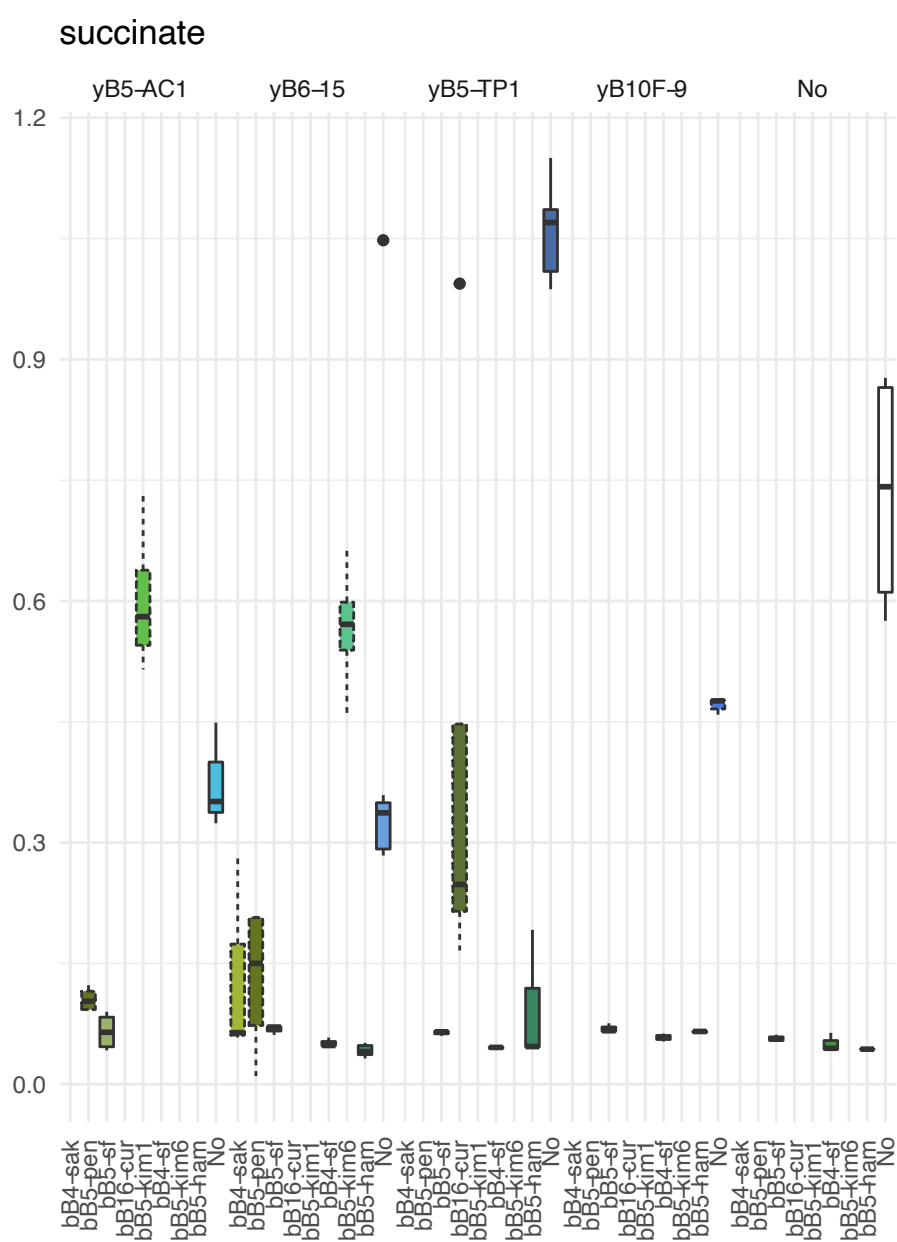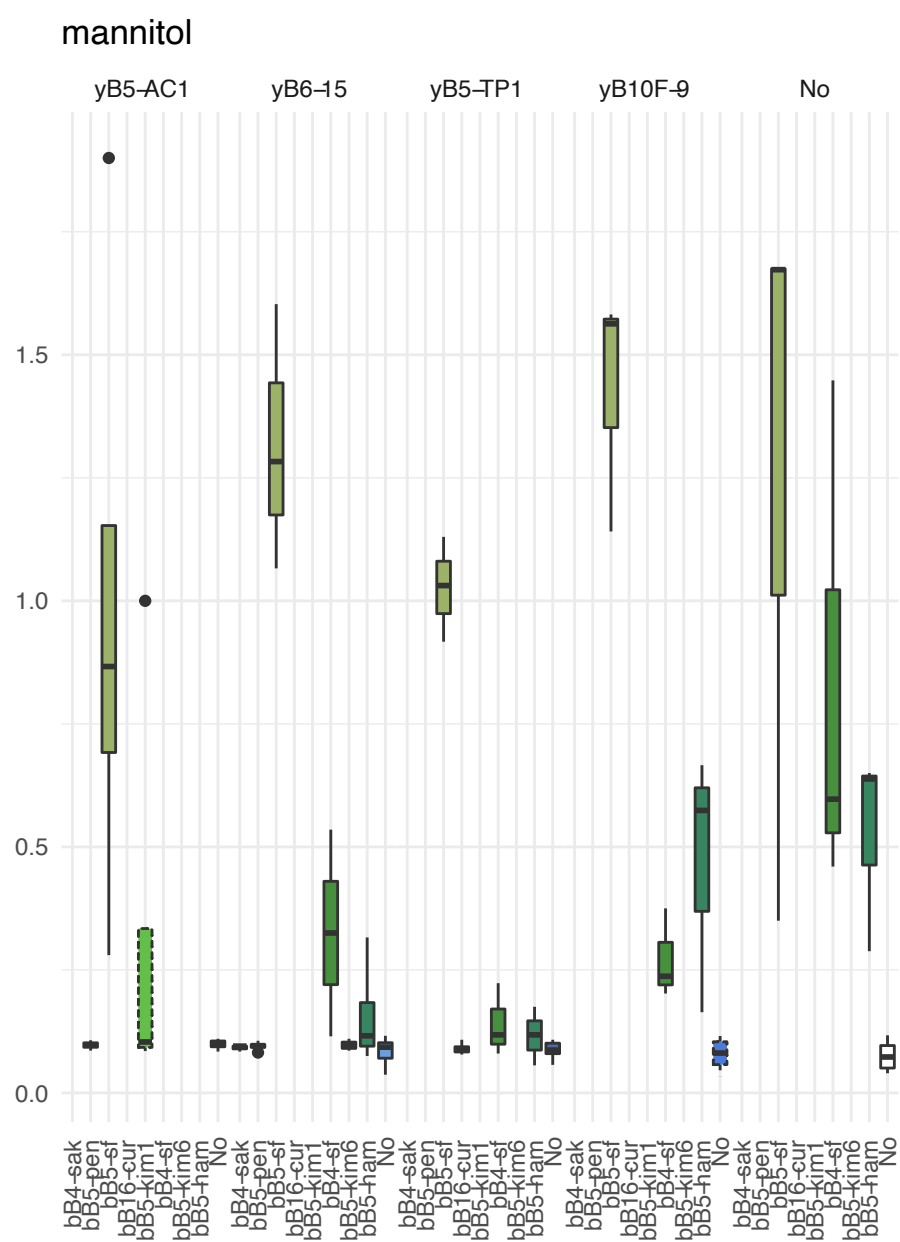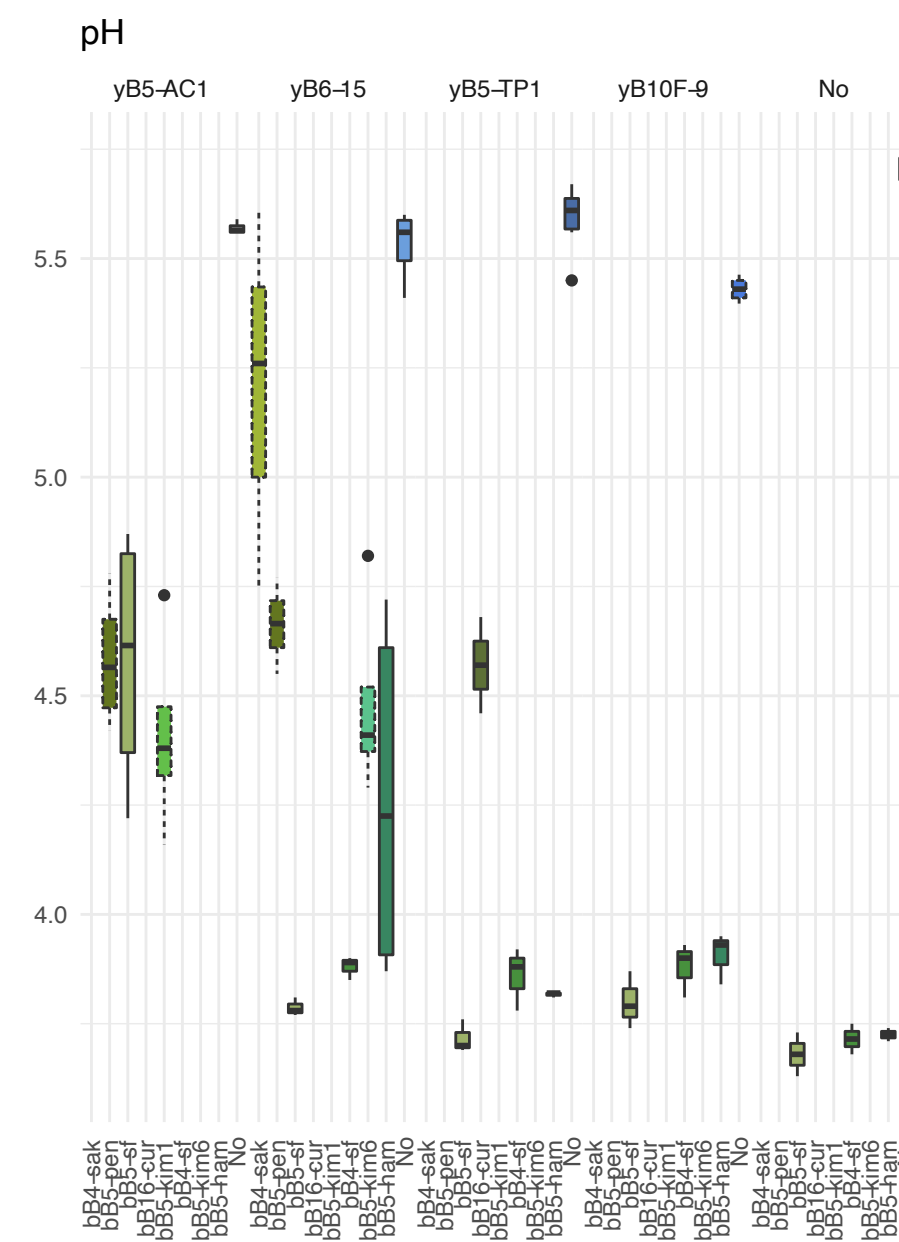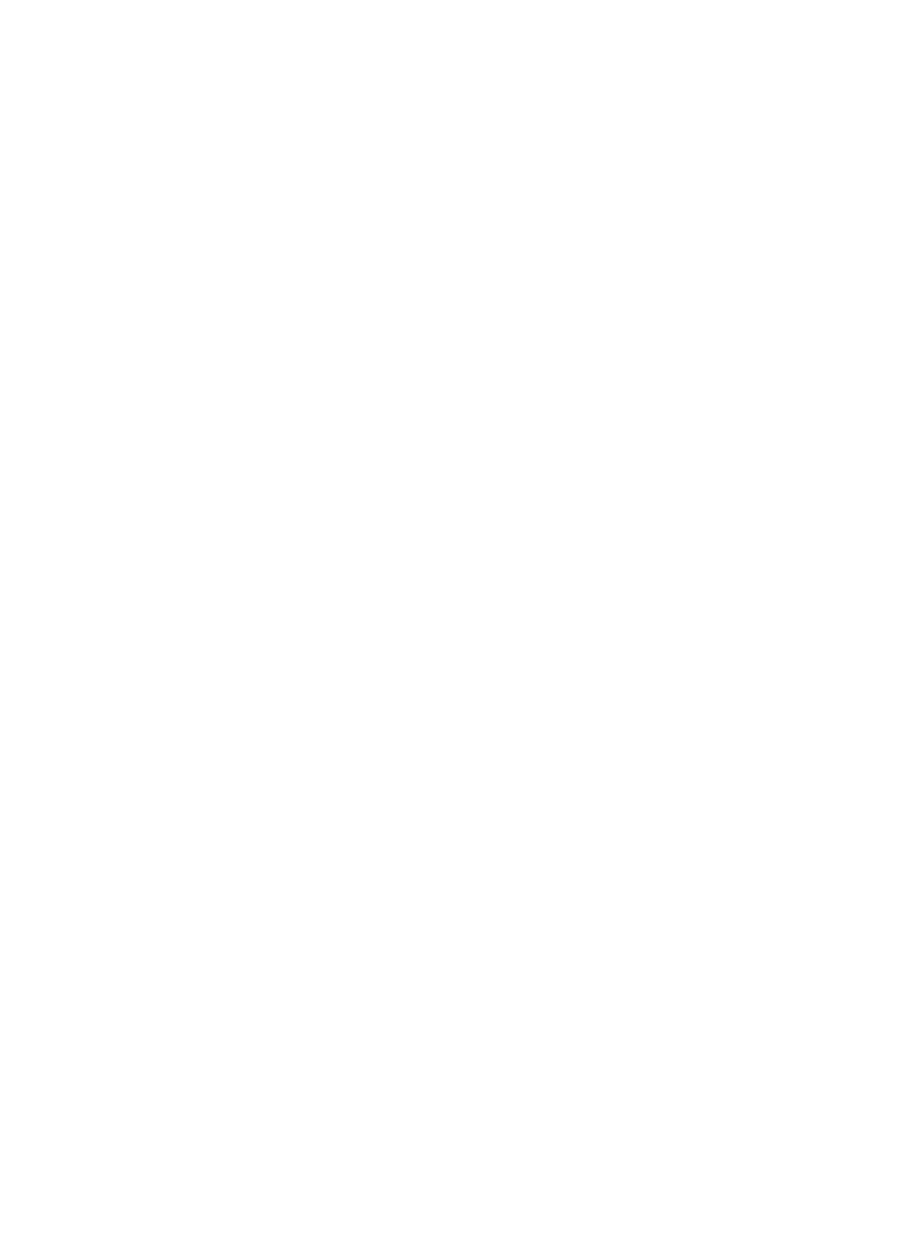

Supplement: s1 [file s1]

## LAB strains

## Yeast strains

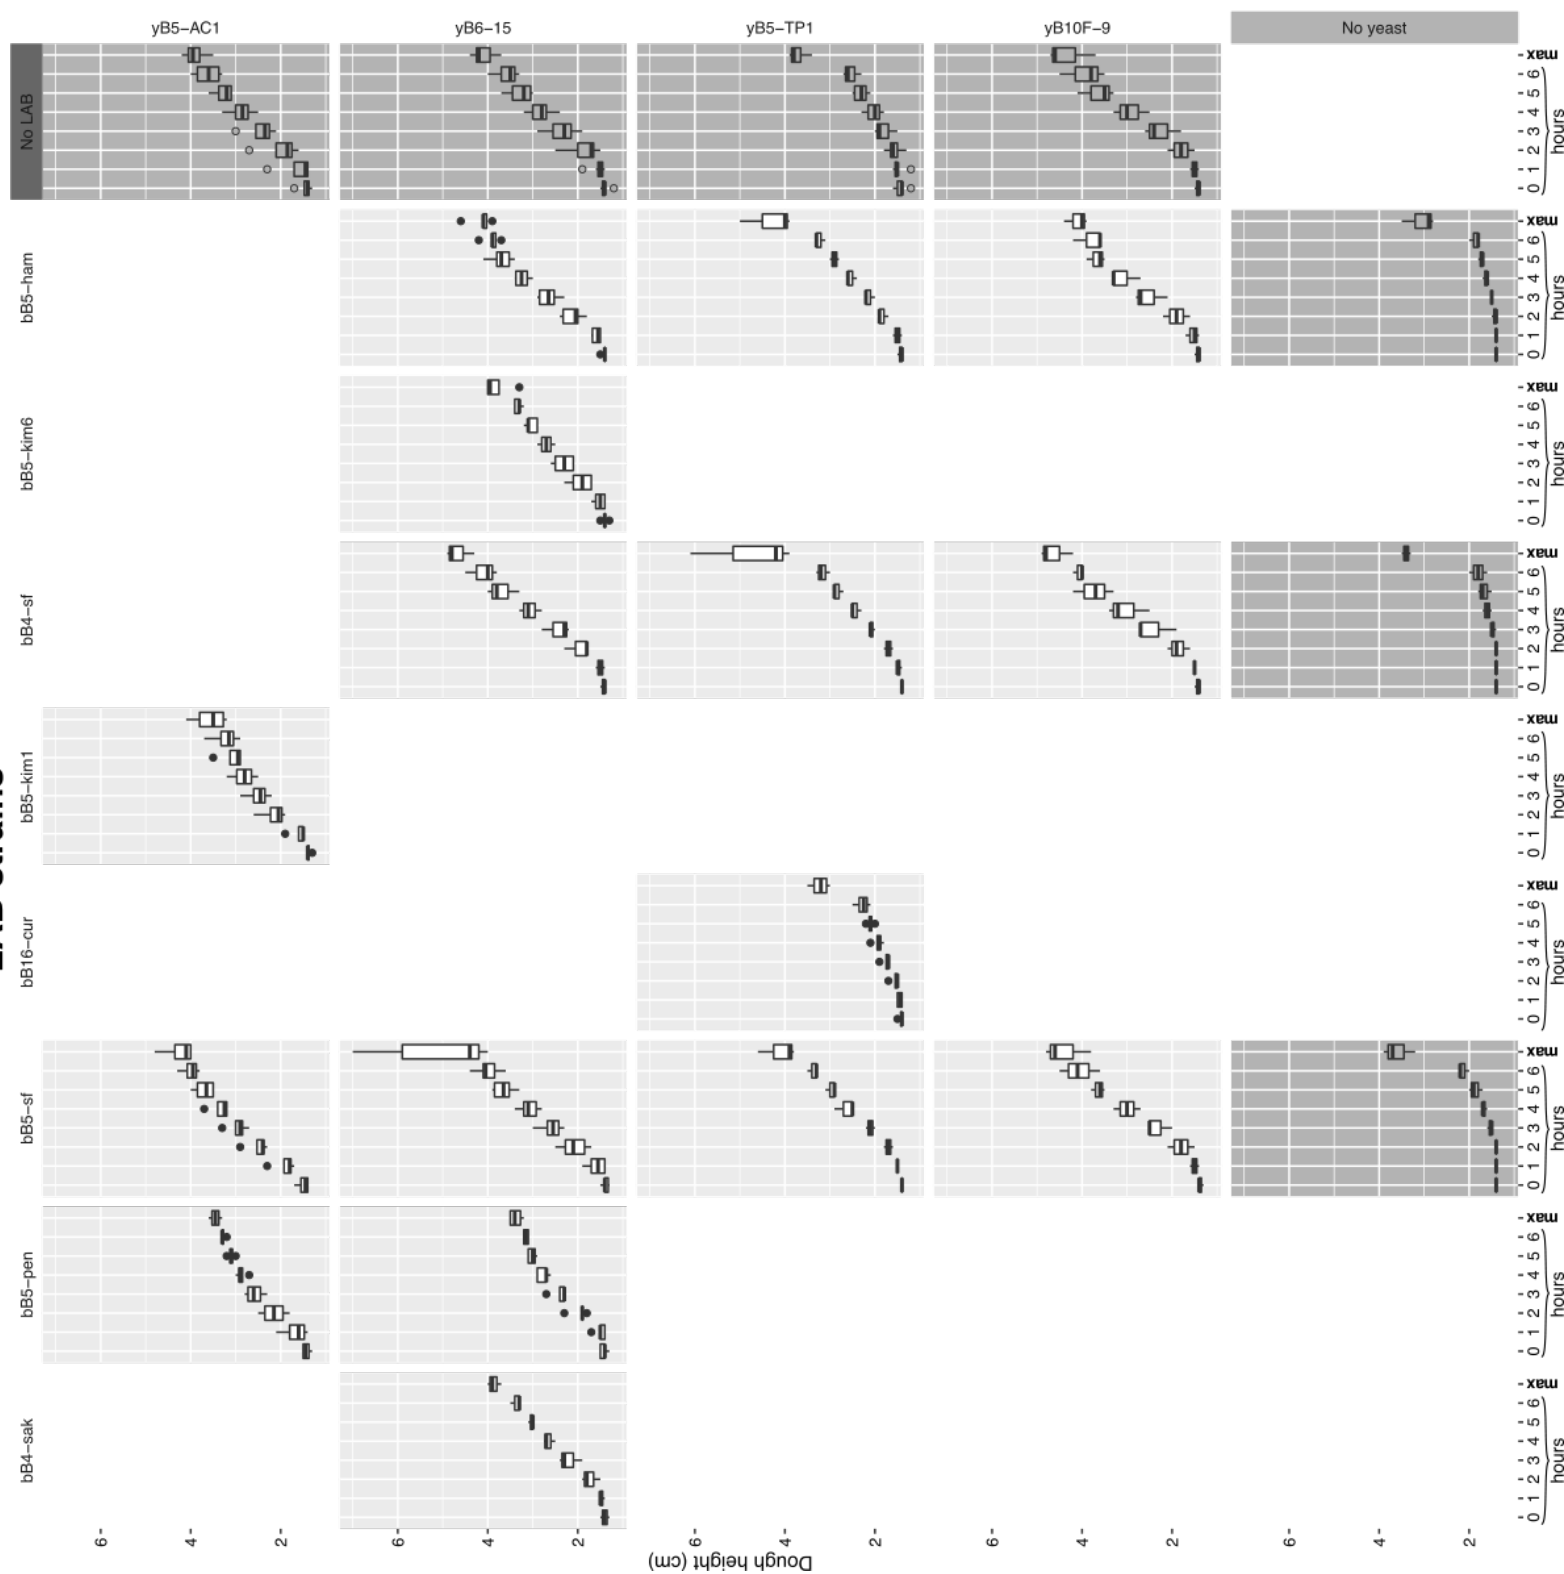

Supplement: s1 [file s1]

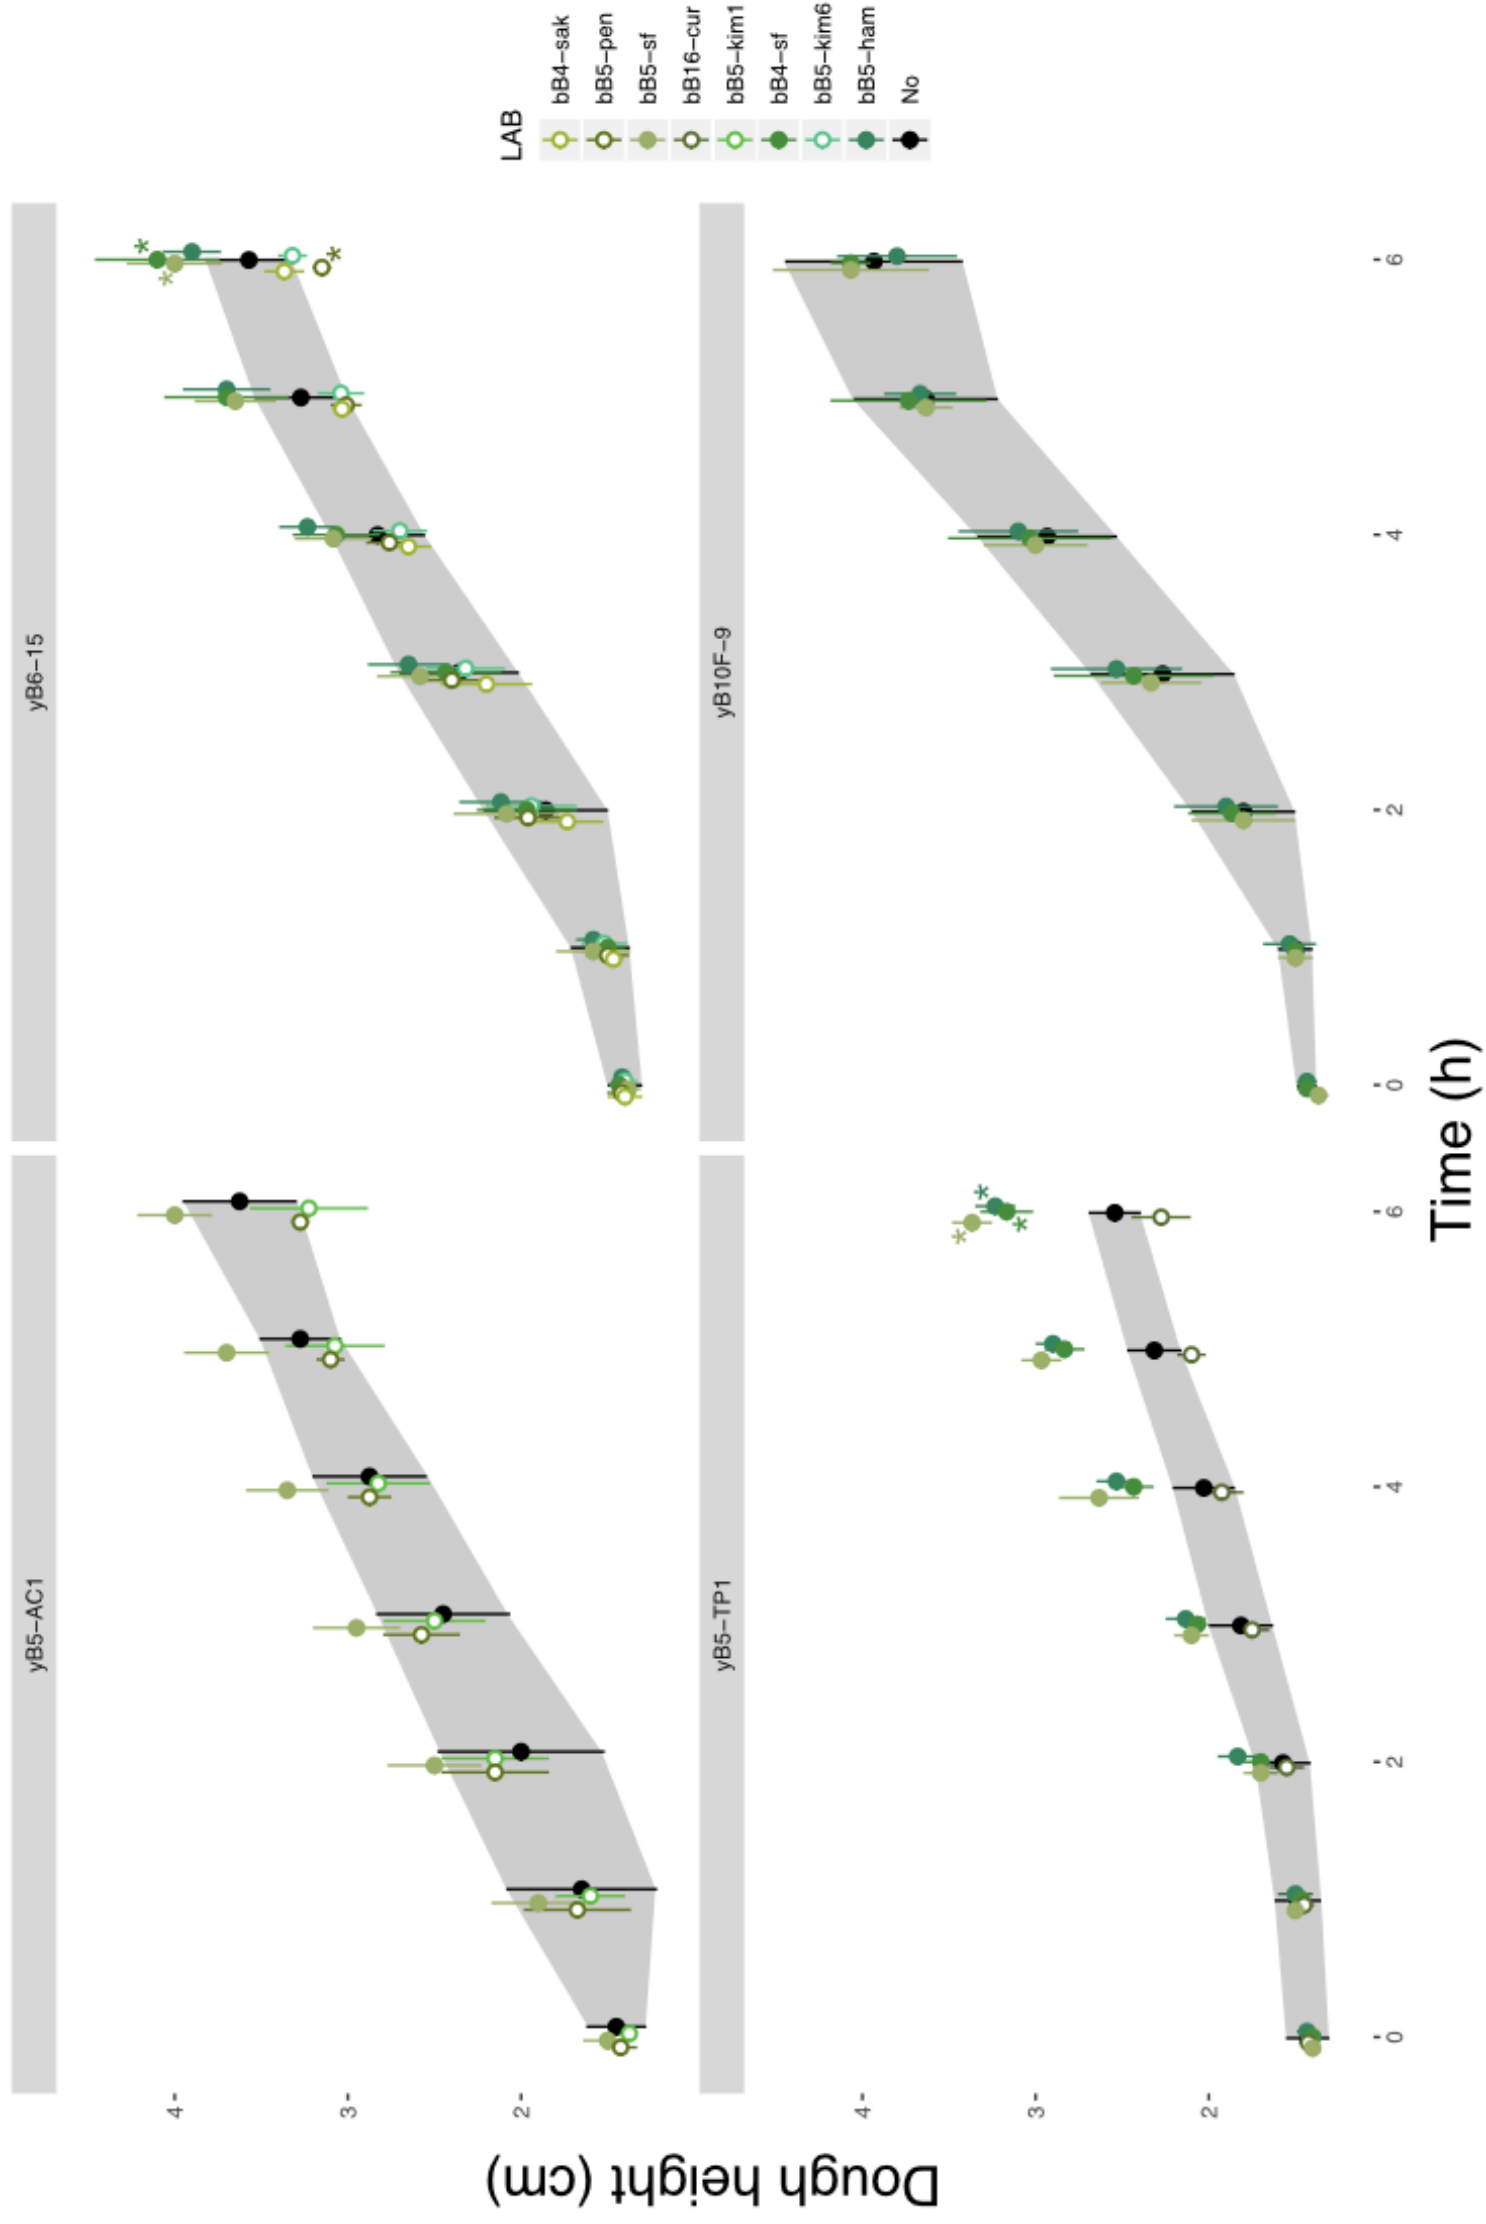

Supplement: s1 [file s1]
